# Supplementary material
Source: PubMed Central journal article supplement (PMC3675925)
Supplement: AEM.00080-13_zam999104430so1.pdf [file AEM.00080-13_zam999104430so1.pdf]

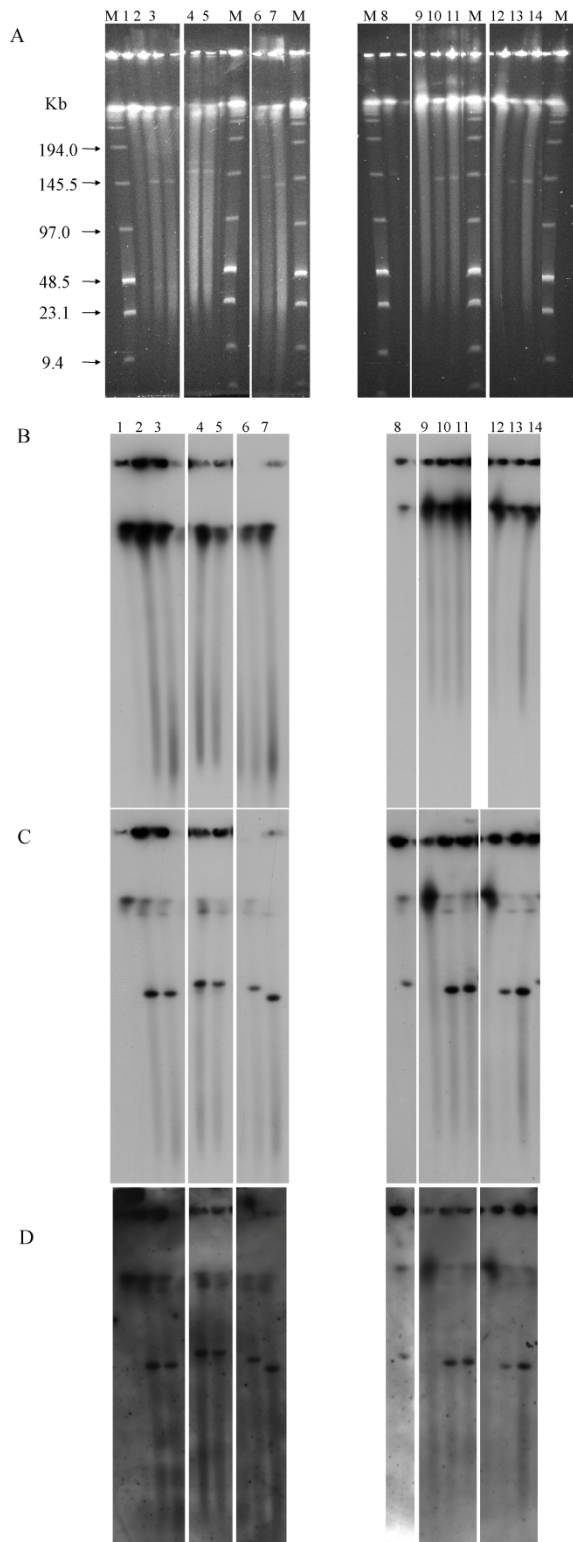

FIG. S1. PFGE of genomic DNA of *C. botulinum* type E (A) and Southern hybridization with probes specific for 16S *rrn* (B), *botE* (C) and *orfX1* (D). At least three biological replicates of each strain were tested. Lanes: Marker (lane M), strain Beluga (lanes 1, 9, 12), CB11/1-1 (lanes 2, 3, 8), K51 (lanes 4, 5, 6) and K22 (lanes 7, 10, 11, 13, 14).
